# Supplementary material for: Vitamin D3 deficiency induced intestinal inflammatory response of turbot through nuclear factor-κB/inflammasome pathway, accompanied by the mutually exclusive apoptosis and autophagy
Source: PubMed Central journal article supplement (PMC9493454; doi:10.3389/fimmu.2022.986593), 2022-09-08
Supplement: DataSheet_1.pdf [file DataSheet_1.pdf]

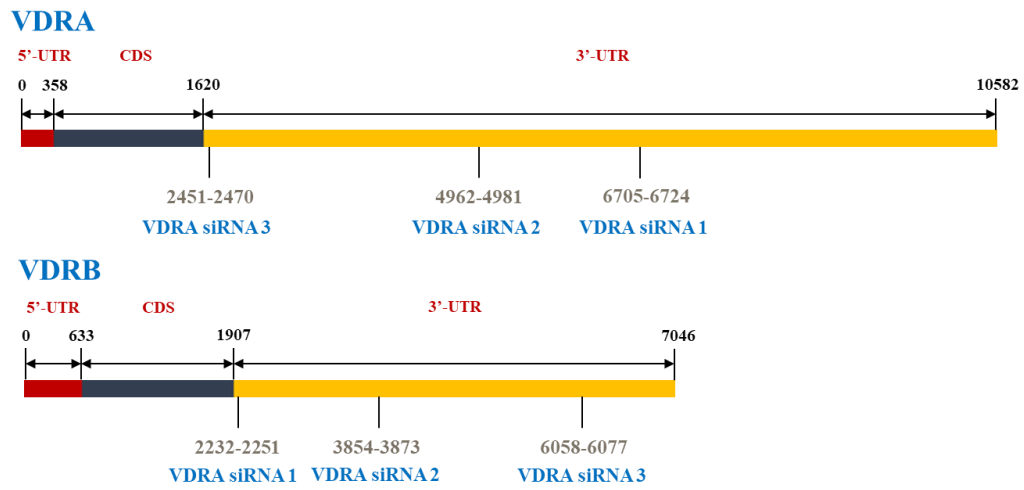

**Figure S.** Region of mRNA where the siRNAs of VDRA&B are designed
